1 **Enteric glia adopt an activated pro-inflammatory state in response to human and bacterial**  
2 **amyloids**

3 Peter Verstraelen<sup>1</sup>, Samuel Van Remoortel<sup>1</sup>, Nouchin De Loose<sup>1</sup>, Rosanne Verboven<sup>1</sup>, Gerardo  
4 Garcia-Diaz Barriga<sup>1</sup>, Anne Christmann<sup>2</sup>, Manuela Gries<sup>2</sup>, Cagla Tükel<sup>3</sup>, Sales Ibiza Martinez<sup>1</sup>,  
5 Karl-Herbert Schäfer<sup>2</sup>, Jean-Pierre Timmermans<sup>1,4,5\*</sup> and Winnok H. De Vos<sup>1,4,5\*§</sup>

6 <sup>1</sup>Laboratory of Cell Biology & Histology, University of Antwerp, 2610 Wilrijk, Belgium

7 <sup>2</sup>Department of Informatics and Microsystems and Technology, University of Applied Science  
8 Kaiserslautern, Working Group Enteric Nervous System, D-66482 Zweibrücken, Germany

9 <sup>3</sup>Center for Microbiology and Immunology, Lewis Katz School of Medicine, Temple University,  
10 Philadelphia, United States

11 <sup>4</sup>Antwerp Centre for Advanced Microscopy, University of Antwerp, Antwerp, Belgium

12 <sup>5</sup> $\mu$ Neuro Research Centre of Excellence, University of Antwerp, Antwerp, Belgium

13 \*joint senior authorship

14 §corresponding author: [winnok.devos@uantwerpen.be](mailto:winnok.devos@uantwerpen.be)

15 **Classification:** biological sciences

16 **Keywords:** microbiome-gut-brain axis, amyloid, curli, myenteric neurons, intramural injections

17 **Abstract**

18 Mounting evidence suggests a role for the microbiome-gut-brain axis in amyloid-associated  
19 neurodegeneration, but the pathogenic changes induced by amyloids in the gastro-intestinal tract  
20 remain elusive. To scrutinize the early response to amyloids of human and bacterial origin, we  
21 challenged primary murine myenteric networks with A $\beta$ <sub>1-42</sub> (vs a scrambled version of A $\beta$ <sub>1-42</sub>) and  
22 curli (vs culture medium), respectively, and performed shotgun RNA sequencing. Both amyloid  
23 types induced a transcriptional signature of DNA damage and cell cycle dysregulation. Using *in*  
24 *vitro* neurosphere-derived cultures and *in vivo* amyloid injections we found that enteric glia and  
25 smooth muscle cells were the most responsive cell types, showing increased proliferation,  $\gamma$ H2AX  
26 burden and SOD2 levels after amyloid challenge. Consistent with this activated state, we identified  
27 a pro-inflammatory hub in the transcriptional profile of amyloid-stimulated myenteric networks.  
28 Enteric glia were the principal source of the associated cytokines, and *in vivo*, this was  
29 accompanied by an influx of immune cells. Together, these results shed new light on the intrinsic  
30 vulnerability of ENS cells to both amyloid species and position enteric glial cell activation as an  
31 early driver of neurodegenerative disease progression.

32 **Significance statement**

33 The increasing socio-economic impact of Alzheimer's disease (AD), long sub-clinical disease  
34 progression window, and failure of drug candidates demand mechanistic insight into the early  
35 stages of disease development. Epidemiological associations and experimental studies in rodents  
36 suggest that the gut may be vulnerable to amyloids and mediate their transfer to the brain.  
37 However, whether and how amyloids induce local pathology in the gastro-intestinal wall is not  
38 known. We identified a pathogenic program that becomes activated in the gastro-intestinal tract  
39 after exposure to amyloid  $\beta$  and curli (the main bacterial amyloid), and show that enteric glia are  
40 responsible for creating an amyloid-induced pro-inflammatory environment. This insight of an  
41 early response in a distant, more accessible organ than the brain, may have important implications  
42 for both disease diagnosis and therapy.

43

## 44 **Introduction**

45 Uptake of nutrients in the gastro-intestinal (GI) tract happens in an organ-autonomous fashion  
46 coordinated by the enteric nervous system (ENS), while the brain merely exerts modulatory  
47 functions. Recently, the gut-brain connection has gained attention since it might represent a more  
48 accessible and faster route for diagnosing and modulating sporadic neurodegenerative disorders  
49 like Alzheimer's disease (AD)<sup>1</sup>. This was fueled by epidemiologic correlation between  
50 Inflammatory Bowel Disease (IBD, *i.e.*, recurrent GI inflammation) and dementia risk<sup>2,3</sup>, by  
51 parallel neuropathological manifestations in the brain and ENS of mouse models with a mutated  
52 Amyloid Precursor Protein (APP)<sup>4,5</sup>, and by experimental transfer of injected amyloids from the  
53 GI tract towards the brain in mice<sup>6</sup>.

54 An estimated 40% of bacterial species in our environment produce amyloidogenic proteins for cell  
55 attachment and biofilm formation<sup>7-9</sup>, many of which are also present in the GI tract. In addition,  
56 enteric neurons express amyloid precursor protein (APP)<sup>10,11</sup>, raising the probability for GI tissue  
57 to become exposed to amyloids from the outside and from within. It has been proposed that  
58 bacterial amyloids penetrate a leaky epithelial barrier during (inflamm)aging, that host-derived and  
59 human amyloids can seed each other's aggregation, and that they use the same receptors (Toll Like  
60 Receptors, TLRs) to activate the innate immune system<sup>12-14</sup>. Curli, the principal amyloid produced  
61 by Gram-negative bacteria, was identified in a genome-wide screen as a bacterial product that  
62 promotes neurodegeneration in *C. Elegans*<sup>15</sup>, and experimental colonization with curli-producing  
63 bacteria promoted  $\alpha$ -synuclein pathology in the GI tract and brain of mice and rats<sup>16,17</sup>. Similarly,  
64 injection of A $\beta$ <sub>1-42</sub> into the GI wall exacerbated amyloidosis in the n. vagus and brain of ICR  
65 mice<sup>6,18</sup>. In the AD brain, amyloid pathology is accompanied by chronic neuroinflammation,  
66 oxidative stress and accumulation of DNA damage<sup>19-22</sup>. However, studies on the local effects of

67 amyloids in the ENS are lacking. Therefore, we have challenged myenteric networks with A $\beta$ <sub>1-42</sub>  
68 and curli, the archetypal human and bacterial amyloids<sup>23</sup>, and studied the downstream pathogenic  
69 events in different *in vitro* and *in vivo* models.

## 70 **Materials and methods**

### 71 *Animal housing*

72 Wild-type black6.N mice were bred and group-housed in the central animal facility at the  
73 University of Antwerp with food and water *ad libitum* and a dark/light cycle of 12/12h. All  
74 experimental procedures were approved by the ethical committee for animal testing of the  
75 University of Antwerp (file 2017-88).

76

### 77 *Amyloid preparation*

78 Human amyloids A $\beta$ <sub>1-42</sub> (rPeptide A-1002-2), fluorescent A $\beta$ <sub>1-42</sub>-hilyte555 (Anaspec AS-60480-  
79 01), scrambled A $\beta$ <sub>1-42</sub> (A $\beta$ <sub>scr</sub>; rPeptide A-1004-1) or fluorescent A $\beta$ <sub>scr</sub>-FAM (Anaspec AS-60892)  
80 were reconstituted in 1% NH<sub>4</sub>OH to obtain a 1 mM stock solution, bath sonicated and aliquoted  
81 for storage at -80 °C. The day before an experiment, an aliquot was dissolved in sterile PBS to a  
82 concentration of 10  $\mu$ M, bath sonicated and allowed to oligomerize for 24h at 4 °C. Curli fibrils  
83 were isolated from Salmonella Typhimurium as previously described<sup>24</sup>. Mature curli fibrils  
84 (containing more nucleic acid) were used for the RNA sequencing, while intermediate fibrils were  
85 used for *in vitro* and injection experiments. These curli fibrils are devoid of lipopolysaccharide  
86 (LPS) and do not activate TLR4<sup>25</sup>. Fluorescent labeling of intermediate curli was performed using  
87 a HiLyte Fluor 555 protein labeling kit (Anaspec AS-72045). An aliquot of curli or curli-  
88 HiLyte555 was thawed from -80 °C, dissolved to the desired concentration, bath sonicated, and  
89 immediately used. For both amyloid types, low-binding Eppendorf tubes and filter tips were used  
90 to ascertain maximal recovery.

91

92 *Myenteric network isolation*

93 Myenteric networks were isolated as described previously<sup>26</sup>. Briefly, animals were sacrificed via  
94 cervical dislocation and exsanguination, after which the entire colon was removed and transferred  
95 to a dish containing ice-cold dissection buffer (MEM with GlutaMAX and HEPES + 1%  
96 PenStrep). The mesentery was removed and the colon cut open along the mesentery line. The  
97 muscularis externa was stripped off with fine forceps under a binocular microscope, cut into small  
98 (~25 mm<sup>2</sup>) pieces and enzymatically digested (0.4 U Liberase (Roche 5401151001) and 60 U  
99 DNase I (Applichem A3778) in HBSS -Ca-Mg, 37 °C and 5% CO<sub>2</sub> for 4.5h without shaking).  
100 Remaining smooth muscle cells were mechanically removed by gentle pipetting under a binocular  
101 stereomicroscope until the space between the ganglia was devoid of cells. The cleaned networks  
102 were transferred to a 48-well plate (4 wells per mouse, 3 mouse replicates, 12 wells in total) with  
103 250 µl culture medium (DMEM-F12 with GlutaMAX (ThermoFisher 31331028), 2% B27  
104 supplement (ThermoFisher 17504044), 1% bovine serum albumin, 0.1% β-mercaptoethanol, 1%  
105 PenStrep). After an overnight recovery period, the networks were stimulated with 1 µM  
106 oligomerized Aβ<sub>1-42</sub> or Aβ<sub>scr</sub>, or an equivalent quantity mature curli fibrils (5 µg/ml) or non-  
107 supplemented DMEM-F12 medium. Exactly 24h after the amyloid addition, networks were lysed  
108 in RLT buffer + 1% β-mercaptoethanol for RNA isolation, and conditioned medium was collected  
109 for cytokine measurements via U-Plex Meso Scale Discovery analysis.

110

111 *mRNA sequencing*

112 RNA was isolated using an RNeasy micro kit (Qiagen), its concentration measured with a Qubit  
113 device (ThermoFisher) and the integrity checked with a Bioanalyzer RNA pico chip (Agilent,

114 RIN>8). cDNA libraries were prepared using a QuantSeq 3' mRNA-Seq Library Prep kit FWD  
115 (Lexogen) and a qPCR add-on kit after which they were run on a Fragment Analyzer (Agilent),  
116 equimolar pooled and sequenced using an Illumina NextSeq 500/550 High Output Kit v2.5 (75  
117 Cycles). Resulting reads were trimmed using the UrQt and SortMeRNA packages for R and  
118 aligned to the mouse reference genome (mm10) using Rsubread. Differentially expressed genes  
119 (DEGs) were identified using DESeq2 with standard settings (Benjamini-Hochberg-adjusted p-  
120 value cut-off at 0.1). Volcano plots were made in Graphpad Prism 9. Functional annotation,  
121 including GeneOntology term enrichment and construction of a network plot were done with  
122 Metascape using default settings<sup>27</sup>.

123

#### 124 *Preparation of neurosphere-derived enteric glial/smooth muscle and neuronal cultures*

125 Small and large intestines were dissected from E14 embryos and digested with 1 mg/ml DNase 1  
126 (AppliChem A3778) and 1 mg/ml collagenase A (Merck Millipore 10103586001) in DMEM-F12  
127 at 37 °C while shaking. After 20 min, the partly digested intestines were pipetted up and down  
128 with a 100 µl pipette. After 45 min digestion, samples were filtered through a 70 µm cell strainer  
129 and cells were collected in DMEM-F12 medium supplemented with 1% glutamax, 1% HEPES,  
130 1% sodium pyruvate and 1% PenStrep. They were centrifuged (5 min, 300g) and resuspended in  
131 DMEM-F12 medium additionally supplemented with 2% B27, 40 ng/ml EGF (ImmunoTools  
132 12343407) and 20 ng/ml FGF (ImmunoTools 12343627). Cell material of 1 embryo was divided  
133 over 2 wells of a 6-well plate, in a volume of 2 ml per well. Neurospheres were allowed to grow  
134 for 1 week whereby growth factors were replenished at day 2 and an additional 1 ml of complete  
135 medium was added at day 4 after isolation. For final plating, supernatant containing non-attached  
136 neurospheres was collected and centrifuged (5 min, 300g). Attached neurospheres were briefly



137 trypsinized, added to the same tube, and again centrifuged (5 min, 300g). To obtain enriched  
138 enteric glia cultures, neurospheres were plated onto PDL-coated 24- or 96-well plates in DMEM  
139 containing 10% FBS, 1% glutamax, 1% HEPES, 1% sodium pyruvate and 1% PenStrep. Glial  
140 cultures were used for experiments 5-7 days after final plating. To obtain neuronal cultures,  
141 neurospheres were plated onto PDL-coated 24- or 96-well plates in Neurobasal medium with 2%  
142 B27, 40 ng/ml GDNF (R&D Systems 512-GF-010), 1% glutamax, 1% HEPES and 1% PenStrep.  
143 The neuronal network was allowed to grow for 7 days before experimental treatments were started.  
144 Human oligomeric amyloids were used at a final concentration of 1  $\mu$ M, and an equivalent quantity  
145 of intermediate curli fibrils (5  $\mu$ g/ml) was used to stimulate neurosphere-derived cultures. LPS  
146 from *E. Coli* (InvivoGen tlr1-3pelps) was used at a final concentration of 100 ng/ml, and EdU  
147 (ThermoFisher C10338) was added for 4h at a final concentration of 10  $\mu$ M and developed  
148 according to the manufacturer's instructions.

149

#### 150 *Intramural injections and whole mount preparation*

151 Mice were injected at the age of 8 weeks. Anesthesia was induced with 5 and maintained with  
152 2.5% isoflurane in O<sub>2</sub>. Animals were shaved and the abdomen washed with germicidal soap. The  
153 eyes were covered with an ophthalmologic gel and the animals were placed on a heating pad and  
154 covered with a sterile operation cloth. A pre-emptive subcutaneous injection with 0.05 mg/kg  
155 buprenorphine was administered, after which the abdominal cavity was opened along the *linea*  
156 *alba*. The caecum was exteriorized and regularly wetted with physiological solution. Oligomeric  
157 A $\beta$ <sub>1-42</sub>-HiLyte555, A $\beta$ <sub>scr</sub>, A $\beta$ <sub>scr</sub>-FAM, fibrillar curli, fibrillar curli-HiLyte555 or sterile PBS was  
158 injected into the colon wall at 5 injection sites in a 1 cm region of the proximal colon. A total  
159 amount of 8  $\mu$ g in 5 x 2  $\mu$ l was injected using a 35G NanoFill needle. The region where the

160 injections were given was marked by 2 final injections with tattoo ink. The abdominal muscles  
161 were fully closed by using continuous suture with 5.0 resolvable thread. The skin was then closed  
162 using subcutaneous sutures with 5.0 silk thread. Finally, a subcutaneous injection with 0.05 mg/kg  
163 buprenorphine was given before animals were placed under a heating lamp for recovery. The  
164 animals were placed in separate cages and closely monitored. The next morning, a final  
165 subcutaneous injection with 0.05 mg/kg buprenorphine was given. Mice were sacrificed by  
166 cervical dislocation, exactly 2 hours, 3 or 7 days after intramural injection. The proximal colon  
167 was dissected out and flushed with ice-cold Krebs solution. After removing the mesentery, the  
168 colon was opened along the mesentery line and pinned open in a black Sylgard Petri dish and fixed  
169 with 4% paraformaldehyde (PFA; 2h at room temperature (RT) for immunostaining or 24h at 4 °C  
170 for fluorescence *in situ* hybridization). Myenteric whole mounts were prepared by separating the  
171 external muscle layer from the submucosa/mucosa and removing the circular muscle layer under  
172 a binocular stereomicroscope.

173

#### 174 *Immunostaining & microscopic imaging*

175 All immunostaining steps were done in 96-well plates (50 µl/well) for cell cultures and in 1.5 ml  
176 Eppendorf tubes (150 µl/tube) at RT whilst gently shaking for whole mounts. Permeabilization  
177 was done in blocking buffer (0.1% bovine serum albumin, 10% normal horse serum (Innovative  
178 Research IGHSSER) in PBS) with 1% Triton X-100, for 5 min (cell cultures) or 2h (whole  
179 mounts). Primary antibodies (**Table 1**) were applied in blocking buffer for 4h (cultures) or 48h  
180 (whole mounts), followed by a PBS wash. Secondary antibodies (**Table 1**) were applied 2h (cell  
181 cultures) or overnight (whole mounts), followed by 10 min incubation with 4',6-diamidino-2-  
182 phenylindole (DAPI, 2.5 µg/ml) and a final PBS wash. For cell cultures, HCS CellMask Deep Red

183 Stain (ThermoFisher H32721, 2  $\mu\text{g}/\text{ml}$ ) was added along with secondary antibodies. Whole mounts  
184 were cover slipped in Citifluor (EMS 17970-100) with the side of the myenteric plexus facing the  
185 cover glass. Multichannel Z-stacks were acquired on a spinning disk confocal microscope  
186 (UltraVIEW VoX, PerkinElmer) with 20X air and 60X oil immersion objectives (NA 0.75 and 1.4,  
187 respectively), or on a Nikon CSU-W1-SoRa spinning disk system with a 100X silicone immersion  
188 objective (NA 1.35). To obtain overview images of injection sites, 3x3 tiles were recorded with  
189 10% overlap followed by flatfield correction and stitching in Fiji freeware<sup>28</sup>. Segmentation and  
190 quantification of cell images (nuclei, cells and  $\gamma\text{H2AX}$  spots) were done with the in-house  
191 developed Fiji script CellBlocks (<https://github.com/DeVosLab>).

192

### 193 *Quantitative PCR*

194 Cells were lysed (RLT buffer with 1%  $\beta$ -mercaptoethanol) and RNA was isolated via column  
195 purification (NucleoSpin RNA kit, Macherey-Nagel 740955). RNA integrity and concentration  
196 were determined with BioAnalyzer (Agilent) and Nanodrop systems (Thermo Scientific), and 500  
197 ng RNA (RIN>8) was transcribed to cDNA using the iScript first strand cDNA synthesis kit (Bio-  
198 Rad 1708891). qPCR was carried out on a 384-well Quantstudio Flex system (ThermoFisher)  
199 using the SsoAdvanced Universal SYBR Green master mix (Bio-Rad 1725272) with 0.5  $\mu\text{M}$   
200 forward and reverse primers (**Table 2**) and a 1:10 dilution of the cDNA. The protocol comprised  
201 an initial 30s denaturation step (95 °C), followed by 40 cycles of 10s at 95 °C and 30s at 60 °C,  
202 and finally a melting curve. Expression data was normalized to the reference genes, log2  
203 transformed and imported into Genesis<sup>29</sup>, where it was normalized per gene before exporting the  
204 heatmap.

205

206 *Fluorescence in situ hybridization*

207 Fluorescence *in situ* hybridization analysis on whole mounts of the colonic myenteric plexus was  
208 performed using the Advanced Cell Diagnostics RNAscope Fluorescent Multiplex Kit (ACD  
209 320850) according to the manufacturer's instructions. After 24h fixation with 4% PFA at 4 °C,  
210 whole mounts were prepared and dehydrated through a graded ethanol series, followed by  
211 RNAscope Protease III treatment for 40 min at 40 °C. Tissue was then incubated overnight with  
212 fluorescent probe (RNAscope probe 437581 Mm-*Cxcl2*) at 40 °C under orbital shaking. After  
213 hybridization, whole mounts were washed twice with wash buffer and then processed for  
214 sequential hybridization using amplifier DNA (Amp1-FL, Amp 2-FL and Amp 3-FL) and  
215 fluorophore (Amp 4 Alt A-FL) at 40 °C for 30 min, 15 min, 30 min and 15 min, respectively. After  
216 hybridization, tissues were counterstained with SOX10 and DAPI, and mounted with ProLong  
217 Gold antifade reagent (Thermo Fisher P10144).

218

219 *Flow cytometry*

220 A 3 cm piece of the proximal colon, containing the 1 cm injected region, was isolated 7 days after  
221 injection and the muscularis was removed with fine forceps under a binocular stereomicroscope.  
222 Small tissue pieces were digested with 0.5 mg/ml collagenase D (Roche 11088882001) and 5 U/ml  
223 DNase 1 (Sigma-Aldrich 10104159001) in RPMI-1640 supplemented with 2% HEPES and 2%  
224 FBS for 30 min at 37 °C with continuous shaking. The resulting cell suspension was blocked using  
225 FACS buffer and passed through a 70 µm cell strainer, after which cells were centrifuged at 400g  
226 for 8 min at 4°C. Surface staining was performed by incubating cell suspensions for 20 min at 4°C

227 with a mix of fluorescently conjugated antibodies (**Table 1**) in FACS buffer, followed by a PBS  
228 wash. To distinguish the live and dead cells, the cell pellets were resuspended in the Live/Dead  
229 Fixable Aqua Dead Cell Strain kit solution (ThermoFisher L34965) and incubated in the dark at  
230 RT for 30 min. Then, the cell pellets were fixed with 2% PFA at RT for 10 min, followed by a  
231 PBS wash and resuspension in FACS buffer. The samples were acquired using a BD FACSAria II  
232 Cell Sorter, and the obtained data were analyzed using FlowJo software (version 4.6.2, Treestar).

233

### 234 *Experimental design*

235 RNA-Seq was performed on primary myenteric networks that were isolated from 3 mice and were  
236 divided over 4 wells per mouse (for  $A\beta_{1-42}$ ,  $A\beta_{scr}$ , curli or medium treatment). Similarly, cytokine  
237 release was measured in myenteric networks from 8 mice, prepared on 2 different days and  
238 including the 3 mice that were used for RNA-Seq. Microscopic analyses on neurosphere-derived  
239 cultures were carried out on 6 wells with 12 images per well, originating from 3 independent  
240 cultures, *i.e.*, week-separated neurosphere-derived cultures prepared from different mothers (E14  
241 embryos were pooled). Likewise, qPCR was carried out on 3 independent cultures. For all *in vivo*  
242 injections, 3 mouse replicates were considered for each treatment and time point, whereby 2 whole  
243 mounts could be prepared per mouse for different stainings. The number of  $A\beta^+$  myenteric neurons  
244 was assessed by manually counting 10 fields at 20X magnification per whole mount (amounting  
245 to a total of  $\sim 1.3$  mm<sup>2</sup>/whole mount). The percentage of  $Cxcl2^+$  glial nuclei was manually counted  
246 by an observer that was blinded for the treatment and normalized to the total number of  $SOX10^+$   
247 glial nuclei in an image. At least 10 images per whole mount were considered which had on  
248 average 35 glial nuclei per image. Flow cytometry was performed on 4 mouse replicates per  
249 treatment type. Graphing and statistical analyses were carried out in Graphpad Prism 9 and SAS

250 JMP Pro 14. The number of replicates, and results of statistical analyses are reported in the figure  
251 captions. Schematic representations of experimental protocols were created with BioRender.

252 **Results**

253 *Human and bacterial amyloids trigger unique and shared transcriptional responses in primary*  
254 *myenteric networks*

255 To determine whether amyloids affect the ENS, we isolated primary myenteric networks from WT  
256 Black6 mice and challenged them with human ( $A\beta_{1-42}$  vs  $A\beta_{scr}$ ) and bacterial (curli vs medium)  
257 amyloids. 24h later, we analyzed the transcriptome via bulk RNA-Seq (**Fig. 1A**). Inspection of  
258 typical cell type marker genes revealed that the primary networks consisted mainly of neurons,  
259 glia and smooth muscle cells, while immune cells were absent (**Fig. 1B**). Both amyloid types  
260 induced a transcriptional response whereby  $A\beta_{1-42}$  more potently disturbed myenteric network  
261 homeostasis (772 DEGs) than curli (228 DEGs; 53 shared; **Fig. 1C**), and this with good  
262 reproducibility between samples (**Fig. 1D**). This resulted in higher significance of the enriched  
263 gene ontology (GO) terms, with unique pathways such as glycerolipid metabolism being affected  
264 by  $A\beta_{1-42}$  but not by curli ( $-\text{Log}_{10}$  p-value, **Suppl. Fig. 1**). Being more interested in the shared  
265 response, we found that both amyloid types elicited a transcriptional hub of cell cycle  
266 dysregulation (**Fig. 1E**). Well-known cell cycle regulators such as *Pcna*, *Trp53*, *Ccnb1*, *Cdc20* and  
267 *Cdk1* were downregulated, while *Mdm2* was up after amyloid challenge, suggesting a global cell  
268 cycle wavering. In contrast, both amyloid types were represented in a hub concerning ‘muscle cell  
269 proliferation’, suggesting cell type-dependent cell cycle dysregulation. A DNA damage response  
270 was triggered more strongly by curli, while mitochondria and protein kinase B (Akt) signaling  
271 were disturbed mainly by  $A\beta_{1-42}$  (**Fig. 1E**). This illustrates that host-derived and bacterial amyloids  
272 are not inert but trigger a distinct transcriptional pathogenic response in the ENS.

273

274 *Enteric glia and smooth muscle cells become activated after amyloid challenge*

275 Given that the cell cycle signature is unlikely to originate from the post-mitotic myenteric neurons,  
276 we challenged enteric neurosphere-derived glial cultures with human and bacterial amyloids (**Fig.**  
277 **2A**). LPS, a well-known toxin of Gram-negative bacteria and TLR agonist, was included as a  
278 positive control since it has been described to induce astrocyte proliferation and DNA damage *in*  
279 *vitro*<sup>30,31</sup>. The cultures contain enteric glia (positive for GFAP and SOX10) but also smooth muscle  
280 cells ( $\alpha$ -smooth muscle actin<sup>+</sup> ( $\alpha$ SMA); **Suppl. Fig. 2A**). Differential nuclei segmentation based  
281 on SOX10 or DAPI signal showed that both amyloid types increased EdU incorporation in glial  
282 as well as all (glia + smooth muscle) cells, indicating that both cell types adopt a proliferative state,  
283 almost up to similar levels as a treatment with LPS (**Fig. 2B**). Glial and smooth muscle cells also  
284 displayed an increased nuclear  $\gamma$ H2AX spot occupancy, proxy for double-stranded DNA break  
285 repair, 72h after the amyloid addition (**Fig. 2C**). In correspondence with the transcriptomics data,  
286 we found that curli was a more potent inducer of a DNA damage response than A $\beta$ <sub>1-42</sub>. We next  
287 asked whether amyloid-induced cell proliferation and DNA damage were associated with  
288 increased oxidative stress levels, as oxidative DNA damage was previously described in the AD  
289 brain<sup>32</sup>. We therefore immunostained challenged cultures for superoxide dismutase 2 (SOD2), a  
290 mitochondrial enzyme involved in reactive oxygen species clearance, which was also upregulated  
291 in the RNA-Seq dataset and found markedly higher SOD2 levels (**Fig. 2E**).  $\gamma$ H2AX spot  
292 occupancy and SOD2 levels were also increased after LPS stimulation. Hence, our results suggest  
293 that enteric glia and smooth muscle cells adopt an activated state whereby they accumulate DNA  
294 damage, plausibly due to increased proliferation and oxidative stress.

295



296 *In vivo* injected amyloids induce oxidative stress and apoptosis in myenteric neurons and DNA  
297 damage in the smooth muscle layer

298 To further explore the oxidative stress status and DNA damage accumulation *in vivo*, we injected  
299 fluorescently labeled amyloids in the proximal colon wall of live mice and prepared myenteric  
300 whole mounts from the region around the injection site (**Fig. 3A**). While curli fibrils displayed a  
301 random distribution without apparent cellular uptake (**Suppl. Fig. 3A**), we found that injected A $\beta_{1-42}$   
302 accumulated in nuclei of myenteric neurons (**Suppl. Fig. 3B**). This phenomenon was not  
303 observed for its scrambled control (**Suppl. Fig. 3C, D**), and could be modeled *in vitro* by inducing  
304 membrane permeabilization in neurosphere-derived neurons but not by increasing the amyloid  
305 concentration or incubation time (**Suppl. Fig. 3E**), suggesting that oligomeric A $\beta_{1-42}$  sticks to DNA  
306 of degenerating neurons.

307 In line with RNA Seq and IF data, we observed marked SOD2 upregulation, which in this setting  
308 localized to myenteric neurons in curli-injected tissue and to neurons with nuclear A $\beta_{1-42}$  (**Fig.**  
309 **3B**). Increased SOD2 levels were not observed in A $\beta_{scr}$ - or PBS-injected animals, suggesting an  
310 amyloid-driven pathogenic process. Neurons with A $\beta_{1-42}^+$  nuclei had increased levels of cleaved  
311 caspase 3 (**Fig. 3C**), underscoring the capacity of amyloid to induce apoptosis in myenteric  
312 neurons. While these specific neurons did not show overt DNA damage (**Fig. 3D**), we did observe  
313  $\gamma$ H2AX accumulation in the region adjacent to an injection site, which could be identified based  
314 on a local disruption of the neuronal network ( $\beta_{III}$ -tubulin), an accumulation of amyloid, and,  
315 depending on the time point, a cell infiltrate near the damaged part (DAPI) (**Suppl. Fig. 4A**).  
316 Accumulation of  $\gamma$ H2AX-positive nuclei was induced by A $\beta_{1-42}$  and curli but not by the control  
317 injections (A $\beta_{scr}$  and PBS). This occurred in a time-dependent manner, with the largest difference  
318 between amyloid and control at the latest investigated time point, *i.e.*, 7 days after the injection

319 (Fig. 3E arrowheads; the dashed line indicates the injection site). At this stage, nuclei showed  
320 punctate or more diffuse pan-nuclear  $\gamma$ H2AX patterns and morphological deformations suggesting  
321 cell death (Fig. 3F). Inspection of confocal Z-planes showed that these nuclei were not abundant  
322 in the myenteric plexus but were found mainly in the muscle layer (Suppl. Fig. 4B; arrowheads  
323 indicate the myenteric plexus), which was consistent with the previously observed  $\gamma$ H2AX  
324 accumulation in neurosphere-derived smooth muscle cells (Fig. 2C). Thus, amyloids can induce  
325 oxidative stress and DNA damage *in vivo* as well, which may result in neuronal cell death.

326

### 327 *Enteric glia initiate a pro-inflammatory response upon amyloid challenge*

328 Neurosphere-derived glia displayed several features of an activated cell state (Fig. 2). In line with  
329 this, several of the upregulated genes pertained to an innate immune response (Fig. 4A). Therefore,  
330 we decided to further investigate the inflammatory response at the protein level by measuring pro-  
331 inflammatory cytokine concentrations in the cell culture supernatant of amyloid-treated myenteric  
332 networks. Curli induced the release of the pyrogen IL1 $\beta$ , and the chemokines CXCL1, CXCL2,  
333 CCL2, CCL3 and CCL5 (Fig. 4B). Even though similar trends were observed after A $\beta$ <sub>1-42</sub>  
334 stimulation, it only reached statistical significance for CXCL2, suggesting that curli is more  
335 immunogenic, at least at the tested concentration. To determine the cellular origin of the pro-  
336 inflammatory cytokines, we differentiated primary enteric neurospheres to glial cell cultures, or to  
337 enteric neurons (Fig. 4C). While the glial cultures contained a mixture of enteric glia and smooth  
338 muscle cells (Suppl. Fig. 2A), the neuronal cultures were enriched in enteric neurons but also  
339 contained a lower amount of glia and smooth muscle cells (Suppl. Fig. 2B). qPCR analyses  
340 showed that the response to A $\beta$ <sub>1-42</sub> and curli was more pronounced in enteric glia than in neurons,  
341 whereby curli induced cytokine expression with nearly the same potency as LPS (Fig. 4C). To

342 confirm the cytokine-producing cell type *in vivo*, we performed fluorescence *in situ* hybridization  
343 for *Cxcl2* mRNA on whole mount preparations of A $\beta$ <sub>scr</sub> or A $\beta$ <sub>1-42</sub>-injected colon, sacrificed 2h after  
344 injection (**Fig. 4D**). *Cxcl2* transcripts were enriched in enteric glia of the myenteric plexus (as  
345 counterstained with the nuclear marker SOX10) and significantly more abundant in enteric ganglia  
346 that contained neurons with nuclear A $\beta$ <sub>1-42</sub>. In the same whole mounts, ganglia devoid of A $\beta$ <sub>1-42</sub>-  
347 filled neurons were indistinguishable from A $\beta$ <sub>scr</sub>-injected tissue (**Fig. 4D**). The spatial correlation  
348 of glial *Cxcl2* upregulation with nuclear A $\beta$ <sub>1-42</sub> accumulation in the neurons suggests an intricate  
349 neuro-immune interplay in amyloid-associated neurodegeneration. Since many of the observed  
350 chemokines are known to activate the adaptive immune system, we performed flow cytometry on  
351 curli-injected colon to measure peripheral immune cell influx. We observed elevated CD45<sup>+</sup>  
352 immune cells counts in the muscularis 7 days after an intramural injection. At this time point, the  
353 CD45<sup>+</sup>CD3<sup>+</sup>TCR $\beta$ <sup>+</sup> T-cell population specifically showed a significant increase, where curli  
354 exceeded that of sole PBS injection (**Fig. 4E**). Collectively, these data show that amyloids induce  
355 a local inflammatory environment near the ENS that is at least partly initiated by enteric glia and  
356 exacerbated by peripheral immune cell infiltration.

357 **Discussion**

358 During aging and inflammation, the ENS becomes exposed to human as well as bacterial  
359 amyloids<sup>1,4</sup>. This study shows that these amyloids are not innocent bystanders but activate  
360 pathogenic pathways that sustain local pathology and potentially also influence central  
361 neurodegeneration.

362 We observed a pronounced dysregulation of the cell cycle 24h after challenge with either amyloid  
363 type. The bulk RNA-Seq data primarily indicated cell cycle arrest but also contained a small hub  
364 pointing to smooth muscle cell proliferation. Since the subsequent *in vitro* experiments exposed a  
365 clear proliferative state of glial and smooth muscle cells, and given the difference in cellular  
366 composition of myenteric networks and neurosphere-derived glial cultures (which do not contain  
367 neurons) we believe that the myenteric neurons may be responsible for the apparent cell cycle  
368 arrest in the RNA-Seq dataset. Even though they are considered post-mitotic, they express cell  
369 cycle regulators, albeit serving alternate functions such as neurite morphogenesis and synaptic  
370 plasticity<sup>33</sup>. Also, in central neurons, A $\beta$  has been shown to induce ectopic cell cycle re-entry,  
371 which may be detrimental<sup>34-36</sup> but was recently also shown to protect against A $\beta$ -induced  
372 apoptosis<sup>37</sup>.

373 The observed proliferative state of enteric glia was accompanied by an oxidative stress response  
374 (evident by SOD2 upregulation) and accumulation of DNA damage (nuclear  $\gamma$ H2AX spot  
375 occupancy). Consistent with this, amyloids have been shown to promote genomic instability by  
376 increasing oxidative DNA damage in the CNS<sup>32</sup>. They also reduce DNA repair capacity and  
377 sensitize cells to otherwise nonlethal oxidative injury<sup>38</sup>. While a DNA damage response was only  
378 evident in non-neuronal (cycling) cells in our relatively short-term *in vitro* and injection models,

379 other literature reports have described increased  $\gamma$ H2AX signal in neurons of AD patients as well<sup>22</sup>.  
380 In all employed models (primary myenteric networks, neurosphere-derived glial and neuronal  
381 cultures, and *in vivo* injections) we consistently found SOD2 upregulation after challenge with  
382 either amyloid type. This reactive oxygen species (ROS) scavenging enzyme is localized in the  
383 mitochondrial matrix and represents the first line of defense against oxidative stress. SOD2 can be  
384 induced by oxidative stress and TLR2 signaling, and its enzymatic activity is modulated by cyclin  
385 B1, cyclin-dependent kinase 1 and p53<sup>39,40</sup>. The current RNA-Seq data show that all 3 regulatory  
386 genes were downregulated after amyloid stimulation, suggesting dysregulation of the adaptive  
387 oxidative stress response. We suspect that the faster proliferation rate in combination with a  
388 dysregulated oxidative stress response may have rendered glial and smooth muscle cells more  
389 vulnerable to DNA damage. In the *in vivo* injection model, higher SOD2 levels were only evident  
390 in degenerating  $A\beta_{1-42}^+$  neurons. This may be the result of local high concentrations and  
391 mechanical stress in this model but shows that this response is preserved among different cell  
392 types.

393 We found that amyloids, and in particular curli, are potent inducers of an immune response in the  
394 ENS. While both amyloid types show no homology in their amino acid sequences, they are  
395 structurally related in the sense that they form  $\beta$ -sheets which are recognized by TLRs<sup>12,41-43</sup>. The  
396 enhanced immunogenicity of fibrillar curli compared to oligomeric  $A\beta_{1-42}$  may be explained by  
397 formulation differences, since curli fibers contain nucleic acids that represent an additional TLR  
398 substrate compared to the more pure  $A\beta_{1-42}$  oligomers<sup>44</sup>. Many of the cytokines that we identified  
399 in the ENS have a clear link with amyloid-induced neuropathology in the brain as well. IL1 $\beta$  acts  
400 as a pro-inflammatory mediator and pyrogen that is released after intracellular activation of the  
401 NLRP3 inflammasome, for which  $A\beta$  and curli are known inducers<sup>45,46</sup>. Blood levels of IL1 $\beta$ ,

402 NLRP3 and CXCL2 have been positively correlated with the abundance of curli-producing  
403 bacteria in stool, as measured in healthy controls, cognitively impaired patients with and without  
404 amyloid pathology in the brain<sup>47</sup>. CXCR2, the receptor for CXCL1 and CXCL2, is expressed by  
405 microglia and its abundance was increased after intrahippocampal injection of A $\beta$ <sub>1-42</sub>, while a  
406 specific antagonist inhibited microgliosis, oxidative stress and neuronal loss<sup>48</sup>.  
407 Intracerebroventricular injection of A $\beta$ <sub>1-40</sub> in WT mice induced the expression of CCL3 and CCR5,  
408 the receptor for CCL3/4/5, followed by astro- and microgliosis in the hippocampus<sup>49</sup>. A $\beta$ <sub>1-40</sub>  
409 injection in CCL3<sup>-/-</sup> or CCR5<sup>-/-</sup> mouse brains attenuated astro- and microgliosis, synaptic  
410 dysfunction and cognitive defects, suggesting that the CCL3/CCR5 pathway mediates  
411 neuroinflammation and therefore contributes to neurodegeneration. CCL2 is expressed by central  
412 neurons and astrocytes and its levels in CSF at baseline correlate with a faster cognitive decline  
413 and could even be used as a biomarker in combination with CSF Tau, pTau and A $\beta$ <sub>1-42</sub> to predict  
414 future conversion to AD<sup>50,51</sup>. We now show that the same cytokines are involved in the innate  
415 immune response towards amyloids in the GI tract. Another striking parallel between the CNS and  
416 our data obtained in the ENS was recently provided by a study where rat hippocampal astrocytes  
417 were exposed to A $\beta$ <sub>1-40</sub>. The amyloid-treated astrocytes showed increased proliferation,  
418 inflammatory cytokine and SOD2 upregulation, as well as higher ROS levels<sup>52</sup>. This shows that  
419 not only the cytokine palette but also the activated glial state represent significant parallel  
420 manifestations in the GI tract and the brain. If and to what extent these pathways are involved in  
421 reciprocal gut-brain communication and pathology transfer remains to be determined.

422 The current study shows the pathogenic potential of human and bacterial amyloids in the GI tract.  
423 While the long-term consequences on GI homeostasis and contribution to CNS pathology should

424 be studied more in depth, this insight may open novel avenues for novel targets for early diagnosis  
425 and therapeutic intervention of AD and related amyloid pathologies.

426 **Acknowledgements**

427 This work was funded by The Research Foundation Flanders (FWO project G017618N to JPT and  
428 WDV, FWO I003420N to WDV and FWO IRI I000321N to WDV) and the University of Antwerp  
429 (TOP-BOF project 35020 to JPT and WDV and BOF-KP 39616 to PV). CT is supported by NIH  
430 grants AI153325, AI151893, and AI148770. We thank dr. Esther Bartholomeus of the Center for  
431 Medical Genetics, University of Antwerp, for technical support during RNA sequencing.

432

433 **Author contributions**

434 PV, JPT, WDV designed the research; PV, SVR, NDL, RV, AC, MG, SIM performed the research;  
435 PV, GG, SIM analyzed the data; CT, KHS contributed new reagents/analytical tools; PV, WDV  
436 wrote the paper. All authors critically revised and approved the manuscript.

437

438 **Declaration of interests**

439 All authors declare no competing interests.



## 440 References

- 441 1. Cryan JF, O'Riordan KJ, Sandhu K, Peterson V, Dinan TG. The gut microbiome in neurological  
442 disorders. *Lancet Neurol.* 2020;19(2):179-194.
- 443 2. Kim GH, Lee YC, Kim TJ, et al. Risk of neurodegenerative diseases in patients with inflammatory bowel  
444 disease: a nationwide population-based cohort study. *J Crohns Colitis.* 2022;16(3):436-443.
- 445 3. Zhang B, Wang HE, Bai Y-M, et al. Inflammatory bowel disease is associated with higher dementia  
446 risk: a nationwide longitudinal study. *Gut.* 2021;70(1):85.
- 447 4. Manocha GD, Floden AM, Miller NM, et al. Temporal progression of Alzheimer's disease in brains and  
448 intestines of transgenic mice. *Neurobiol Aging.* 2019;81:166-176.
- 449 5. Semar S, Klotz M, Letiembre M, et al. Changes of the enteric nervous system in amyloid- $\beta$  protein  
450 precursor transgenic mice correlate with disease progression. *J Alzheimer's Dis.* 2013;36(1):7-20.
- 451 6. Sun Y, Sommerville NR, Liu JYH, et al. Intra-gastrointestinal amyloid-beta1-42 oligomers perturb  
452 enteric function and induce Alzheimer's disease pathology. *J Physiol.* 2020;598(19):4209-4223.
- 453 7. Westwell-Roper C, Verchere CB. Modulation of Innate Immunity by Amyloidogenic Peptides. *Trends*  
454 *Immunol.* 2019;40(8):762-780.
- 455 8. Tytgat HLP, Nobrega FL, van der Oost J, de Vos WM. Bowel biofilms: tipping points between a healthy  
456 and compromised gut? *Trends Microbiol.* 2019;27(1):17-25.
- 457 9. Sobieszczanska B, Pawlowska B, Duda-Madej A, et al. Effect of amyloid curli fibrils and curli CsgA  
458 monomers from *Escherichia coli* on in vitro model of intestinal epithelial barrier stimulated with  
459 cytokines. *Int J Med Microbiol.* 2019;309(5):274-282.
- 460 10. Arai H, Lee VM, Messinger ML, Greenberg BD, Lowery DE, Trojanowski JQ. Expression patterns of  
461 beta-amyloid precursor protein (beta-APP) in neural and nonneural human tissues from Alzheimer's  
462 disease and control subjects. *Ann Neurol.* 1991;30(5):686-693.
- 463 11. Puig KL, Lutz BM, Urquhart SA, et al. Overexpression of mutant amyloid-beta protein precursor and  
464 presenilin 1 modulates enteric nervous system. *J Alzheimer's Dis.* 2015;44(4):1263-1278.
- 465 12. Tükel C, Nishimori JH, Wilson RP, et al. Toll-like receptors 1 and 2 cooperatively mediate immune  
466 responses to curli, a common amyloid from enterobacterial biofilms. *Cell. Microbiol.*  
467 2010;12(10):1495-1505.
- 468 13. Friedland RP, McMillan JD, Kurlawala Z. What are the molecular mechanisms by which functional  
469 bacterial amyloids influence amyloid beta deposition and neuroinflammation in neurodegenerative  
470 disorders? *Int J Mol Sci.* 2020;21(5):1652.
- 471 14. Bhoite SS, Han Y, Ruotolo BT, Chapman MR. Mechanistic insights into accelerated  $\alpha$ -synuclein  
472 aggregation mediated by human microbiome-associated functional amyloids. *J Biol Chem.*  
473 2022;298(7):102088.
- 474 15. Wang C, Lau CY, Ma F, Zheng C. Genome-wide screen identifies curli amyloid fibril as a bacterial  
475 component promoting host neurodegeneration. *PNAS.* 2021;118(34).
- 476 16. Chen SG, Stribinskis V, Rane MJ, et al. Exposure to the functional bacterial amyloid protein curli  
477 enhances alpha-synuclein aggregation in aged fischer 344 rats and *caenorhabditis elegans*. *Sci Rep.*  
478 2016;6(1):34477.
- 479 17. Sampson TR, Challis C, Jain N, et al. A gut bacterial amyloid promotes  $\alpha$ -synuclein aggregation and  
480 motor impairment in mice. *eLife.* 2020;9:e53111.
- 481 18. Liu JYH, Sun MYY, Sommerville N, et al. Soy flavonoids prevent cognitive deficits induced by intra-  
482 gastrointestinal administration of beta-amyloid. *Food Chem Toxicol.* 2020;141:111396.
- 483 19. Guglielmotto M, Giliberto L, Tamagno E, Tabaton M. Oxidative stress mediates the pathogenic effect  
484 of different Alzheimer's disease risk factors. *Front Aging Neurosci.* 2010;2.

- 485 20. Leng F, Edison P. Neuroinflammation and microglial activation in Alzheimer disease: where do we go  
486 from here? *Nat Rev Neurol*. 2021;17(3):157-172.
- 487 21. Sanders OD, Rajagopal L, Rajagopal JA. The oxidatively damaged DNA and amyloid- $\beta$  oligomer  
488 hypothesis of Alzheimer's disease. *Free Radic Biol Med*. 2022;179:403-412.
- 489 22. Shanbhag NM, Evans MD, Mao W, et al. Early neuronal accumulation of DNA double strand breaks in  
490 Alzheimer's disease. *Acta Neuropathol Commun*. 2019;7(1):77.
- 491 23. Miller AL, Bessho S, Grando K, Tükel C. Microbiome or infections: amyloid-containing biofilms as a  
492 trigger for complex human diseases. *Front Immunol*. 2021;12:638867.
- 493 24. Nicastro LK, Tursi SA, Le LS, et al. Cytotoxic curli intermediates form during Salmonella biofilm  
494 development. *J Bacteriol*. 2019;201(18).
- 495 25. Tükel C, Raffatellu M, Humphries AD, et al. CsgA is a pathogen-associated molecular pattern of  
496 Salmonella enterica serotype Typhimurium that is recognized by Toll-like receptor 2. *Mol Microbiol*.  
497 2005;58(1):289-304.
- 498 26. Grundmann D, Klotz M, Rabe H, Glanemann M, Schafer KH. Isolation of high-purity myenteric plexus  
499 from adult human and mouse gastrointestinal tract. *Sci Rep*. 2015;5:9226.
- 500 27. Zhou Y, Zhou B, Pache L, et al. Metascape provides a biologist-oriented resource for the analysis of  
501 systems-level datasets. *Nat Commun*. 2019;10(1):1523.
- 502 28. Schindelin J, Rueden CT, Hiner MC, Eliceiri KW. The ImageJ ecosystem: An open platform for  
503 biomedical image analysis. *Mol Reprod Dev*. 2015;82(7-8):518-529.
- 504 29. Sturn A, Quackenbush J, Trajanoski Z. Genesis: cluster analysis of microarray data. *Bioinformatics*.  
505 2002;18(1):207-208.
- 506 30. Gupta S, Goswami P, Biswas J, et al. 6-Hydroxydopamine and lipopolysaccharides induced DNA  
507 damage in astrocytes: involvement of nitric oxide and mitochondria. *Mutat Res Genet Toxicol*  
508 *Environmentl Mutagen*. 2015;778:22-36.
- 509 31. Zhang K, Wu S, Li Z, Zhou J. MicroRNA-211/BDNF axis regulates LPS-induced proliferation of normal  
510 human astrocyte through PI3K/AKT pathway. *Biosci Rep*. 2017;37(4).
- 511 32. Mao P, Reddy PH. Aging and amyloid beta-induced oxidative DNA damage and mitochondrial  
512 dysfunction in Alzheimer's disease: implications for early intervention and therapeutics. *Biochim*  
513 *Biophys Acta*. 2011;1812(11):1359-1370.
- 514 33. Frank CL, Tsai L-H. Alternative functions of core cell cycle regulators in neuronal migration, neuronal  
515 maturation, and synaptic plasticity. *Neuron*. 2009;62(3):312-326.
- 516 34. Kodis EJ, Choi S, Swanson E, Ferreira G, Bloom GS. N-methyl-D-aspartate receptor-mediated calcium  
517 influx connects amyloid-beta oligomers to ectopic neuronal cell cycle reentry in Alzheimer's disease.  
518 *Alzheimers Dement*. 2018;14(10):1302-1312.
- 519 35. Lopes JP, Oliveira CR, Agostinho P. Cdk5 acts as a mediator of neuronal cell cycle re-entry triggered  
520 by amyloid-beta and prion peptides. *Cell Cycle*. 2009;8(1):97-104.
- 521 36. Seward ME, Swanson E, Norambuena A, et al. Amyloid-beta signals through tau to drive ectopic  
522 neuronal cell cycle re-entry in Alzheimer's disease. *J Cell Science*. 2013;126(Pt 5):1278-1286.
- 523 37. Ippati S, Deng Y, van der Hoven J, et al. Rapid initiation of cell cycle reentry processes protects  
524 neurons from amyloid-beta toxicity. *PNAS* 2021;118(12).
- 525 38. Cardinale A, Racaniello M, Saladini S, et al. Sublethal doses of beta-amyloid peptide abrogate DNA-  
526 dependent protein kinase activity. *J Biol Chem*. 2012;287(4):2618-2631.
- 527 39. Liu YD, Yu L, Ying L, et al. Toll-like receptor 2 regulates metabolic reprogramming in gastric cancer via  
528 superoxide dismutase 2. *Int j Cancer*. 2019;144(12):3056-3069.
- 529 40. Candas D, Li JJ. MnSOD in oxidative stress response-potential regulation via mitochondrial protein  
530 influx. *Antiox Redox Signal*. 2014;20(10):1599-1617.
- 531 41. Hughes C, Choi ML, Yi J-H, et al. Beta amyloid aggregates induce sensitised TLR4 signalling causing  
532 long-term potentiation deficit and rat neuronal cell death. *Comm Biol*. 2020;3(1):79.

- 533 42. Richard KL, Filali M, Préfontaine P, Rivest S. Toll-like receptor 2 acts as a natural innate immune  
534 receptor to clear amyloid  $\beta$ 1–42 and delay the cognitive decline in a mouse model of Alzheimer's  
535 disease. *J Neurosci*. 2008;28(22):5784-5793.
- 536 43. Tükel C, Wilson RP, Nishimori JH, Pezeshki M, Chromy BA, Bäumlér AJ. Responses to amyloids of  
537 microbial and host origin are mediated through toll-like receptor 2. *Cell Host Microbe*. 2009;6(1):45-  
538 53.
- 539 44. Tursi SA, Lee EY, Medeiros NJ, et al. Bacterial amyloid curli acts as a carrier for DNA to elicit an  
540 autoimmune response via TLR2 and TLR9. *PLoS pathogens*. 2017;13(4):e1006315-e1006315.
- 541 45. Halle A, Hornung V, Petzold GC, et al. The NALP3 inflammasome is involved in the innate immune  
542 response to amyloid-beta. *Nat Immunol*. 2008;9(8):857-865.
- 543 46. Rapsinski GJ, Wynosky-Dolfi MA, Oppong GO, et al. Toll-like receptor 2 and NLRP3 cooperate to  
544 recognize a functional bacterial amyloid, curli. *Infect Immun*. 2015;83(2):693.
- 545 47. Cattaneo A, Cattane N, Galluzzi S, et al. Association of brain amyloidosis with pro-inflammatory gut  
546 bacterial taxa and peripheral inflammation markers in cognitively impaired elderly. *Neurobiol Aging*.  
547 2017;49:60-68.
- 548 48. Ryu JK, Cho T, Choi HB, Jantarantotai N, McLarnon JG. Pharmacological antagonism of interleukin-8  
549 receptor CXCR2 inhibits inflammatory reactivity and is neuroprotective in an animal model of  
550 Alzheimer's disease. *J Neuroinflamm*. 2015;12(1):144.
- 551 49. Passos GF, Figueiredo CP, Prediger RD, et al. Role of the macrophage inflammatory protein-1alpha/CC  
552 chemokine receptor 5 signaling pathway in the neuroinflammatory response and cognitive deficits  
553 induced by beta-amyloid peptide. *Am J Pathol*. 2009;175(4):1586-1597.
- 554 50. Sokolova A, Hill MD, Rahimi F, Warden LA, Halliday GM, Shepherd CE. Monocyte chemoattractant  
555 protein-1 plays a dominant role in the chronic inflammation observed in Alzheimer's disease. *Brain*  
556 *Pathol*. 2009;19(3):392-398.
- 557 51. Westin K, Buchhave P, Nielsen H, Minthon L, Janciauskiene S, Hansson O. CCL2 is associated with a  
558 faster rate of cognitive decline during early stages of Alzheimer's disease. *PLoS one*.  
559 2012;7(1):e30525.
- 560 52. Lennol MP, Canelles S, Guerra-Cantera S, et al. Amyloid- $\beta$ 1-40 differentially stimulates proliferation,  
561 activation of oxidative stress and inflammatory responses in male and female hippocampal astrocyte  
562 cultures. *Mech Ageing Dev*. 2021;195:111462.

563

564

565 **Tables**

566 *Table 1. Primary and secondary antibodies*

| <b>Primary antibody</b>                       | <b>Species/clonality</b> | <b>Company/catalog</b>         | <b>Concentration</b> |
|-----------------------------------------------|--------------------------|--------------------------------|----------------------|
| <b>Staining</b>                               |                          |                                |                      |
| $\alpha$ -smooth muscle actin-Cy3             | Mouse Monoclonal         | Sigma C6198                    | 1 $\mu$ g/ml         |
| $\beta$ <sub>III</sub> -tubulin-AlexaFluor647 | Mouse Monoclonal         | Biologend 801210               | 1 $\mu$ g/ml         |
| Cleaved caspase 3                             | Rabbit Polyclonal        | Cell Signaling Technology 9661 | 0.4 $\mu$ g/ml       |
| $\gamma$ H2AX                                 | Rabbit Polyclonal        | Abcam ab2893                   | 2 $\mu$ g/ml         |
| GFAP                                          | Goat Polyclonal          | Abcam ab53554                  | 2 $\mu$ g/ml         |
| S100 $\beta$                                  | Rabbit Polyclonal        | Dako Z0311                     | 2 $\mu$ g/ml         |
| SOD2                                          | Rabbit Polyclonal        | Abcam ab13533                  | 10 $\mu$ g/ml        |
| SOX10                                         | Goat Polyclonal          | Biotechne AF2864               | 0.2 $\mu$ g/ml       |
| <b>Flow cytometry</b>                         |                          |                                |                      |
| CD45-APC-eFluor780                            | Rat Monoclonal           | eBioscience 47-0451-82         | 0.5 $\mu$ g/ml       |
| CD3e-PerCP-Cy5.5                              | Hamster Monoclonal       | eBioscience 45-0031-82         | 0.5 $\mu$ g/ml       |
| TCR $\beta$ -APC                              | Hamster Monoclonal       | Biologend 109211               | 0.5 $\mu$ g/ml       |
| Ly6G-BV785                                    | Rat Monoclonal           | Biologend-12765                | 0.5 $\mu$ g/ml       |
| <b>Secondary antibody</b>                     |                          |                                |                      |
| Goat-anti-Rabbit Fab fragments – FITC         |                          | Jackson 111-097-003            | 1 $\mu$ g/ml         |
| Donkey-anti-Rabbit – Cy3                      |                          | Jackson 711-165-152            | 2 $\mu$ g/ml         |
| Donkey-anti-Goat – FITC                       |                          | Jackson 705-095-147            | 2 $\mu$ g/ml         |
| Donkey-anti-Goat – Cy3                        |                          | Jackson 507-545-003            | 2 $\mu$ g/ml         |

567

568 *Table 2. Primers for qPCR*

| <b>Gene</b>   | <b>Forward primer</b>   | <b>Reverse primer</b>  |
|---------------|-------------------------|------------------------|
| <i>IL18</i>   | TGCCACCTTTTGACAGTGATG   | TGATGTGCTGCTGCGAGATT   |
| <i>IL6</i>    | CCATAGCTACCTGGAGTACATG  | TGGAAATTGGGGTAGGAAGGAC |
| <i>Cxcl1</i>  | AAGGTGTCCCAAGTAACGG     | TGTTGTCAGAAGCCAGCGTT   |
| <i>Cxcl2</i>  | GCTGTCCCTCAACGGAAGAA    | CAGGTACGATCCAGGCTTCC   |
| <i>Cxcl10</i> | TGAGAGACATCCCAGCCAA     | GAGGCAGAAAATGACGGCAG   |
| <i>Ccl2</i>   | TGCCCTAAGGTCTTCAGCAC    | AAGGCATCACAGTCCGAGTC   |
| <i>Ccl3</i>   | GCCACATCGAGGGACTCTTC    | GATGGGGGTTGAGGAACGTG   |
| <i>Ccl5</i>   | GGAGATGAGCTAGGATAGAGGG  | TGCCCATTTTCCCAGGACCG   |
| <i>Sod2</i>   | AGGAGAGTTGCTGGAGGCTA    | TCTGTAAGCGACCTTGCTCC   |
| <i>Saa3</i>   | CGCAGCACGAGCAGGAT       | TGGCTGTCAACTCCCAGG     |
| <i>eEF2</i>   | TAAGGAGGGCGCTCTCTGTGAGG | TGGCCACCTCCCCGGTGAAT   |
| <i>GAPDH</i>  | TGAAGGTCGGTGTGAACGG     | TGAAGGTCGGTGTGAACGG    |
| <i>RPS29</i>  | GCAAATACGGGCTGAACATG    | GACTAGCATGATCGGTTCCAC  |

569

570 **Figures**

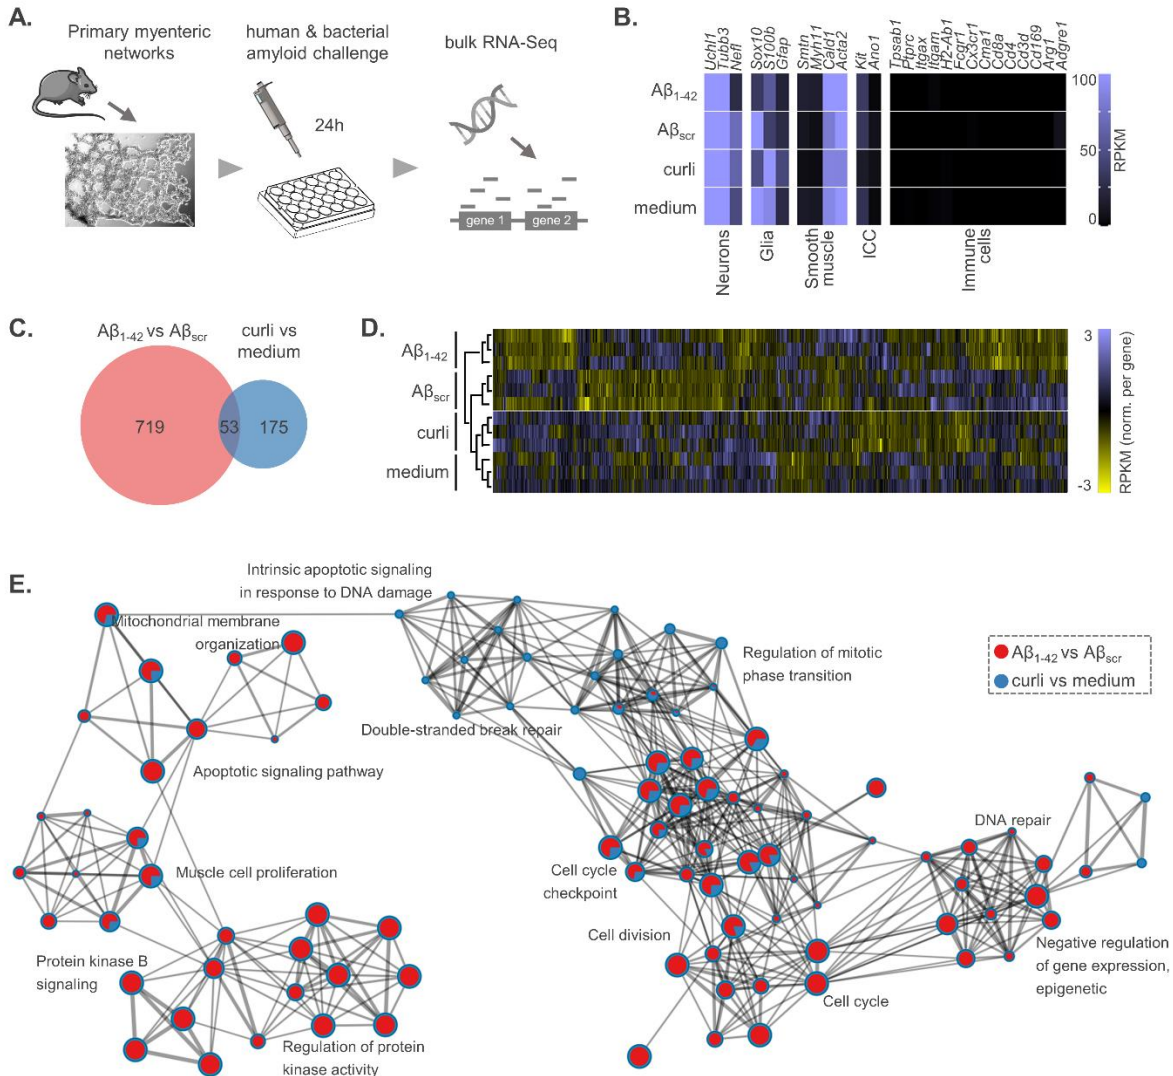

571

572 *Figure 1. Human and bacterial amyloids trigger unique and shared transcriptional responses in*  
 573 *primary myenteric networks*

574 **A.** Experimental workflow. Primary myenteric networks were challenged with human ( $A\beta_{1-42}$  vs  
 575  $A\beta_{scr}$ ) or bacterial (curli vs PBS) amyloid for 24h and processed for bulk RNA-Seq (n=3 animals  
 576 with 4 treatments/animal); **B.** Expression levels of typical cell type markers reveal that primary  
 577 myenteric networks used for RNA-Seq predominantly consist of enteric neurons, glia and smooth

578 muscle cells; **C.** Venn diagram depicting the number of DEGs in both comparisons; **D.** Heatmap  
579 of DEGs show that individual replicates of different treatments cluster and differentiate from the  
580 controls; **E.** Network plot of enriched GO terms represented as nodes, with node size proportional  
581 to the number of DEGs in the term and the color indicating the relative DEG counts of both  
582 treatments (shown as a pie chart).

583



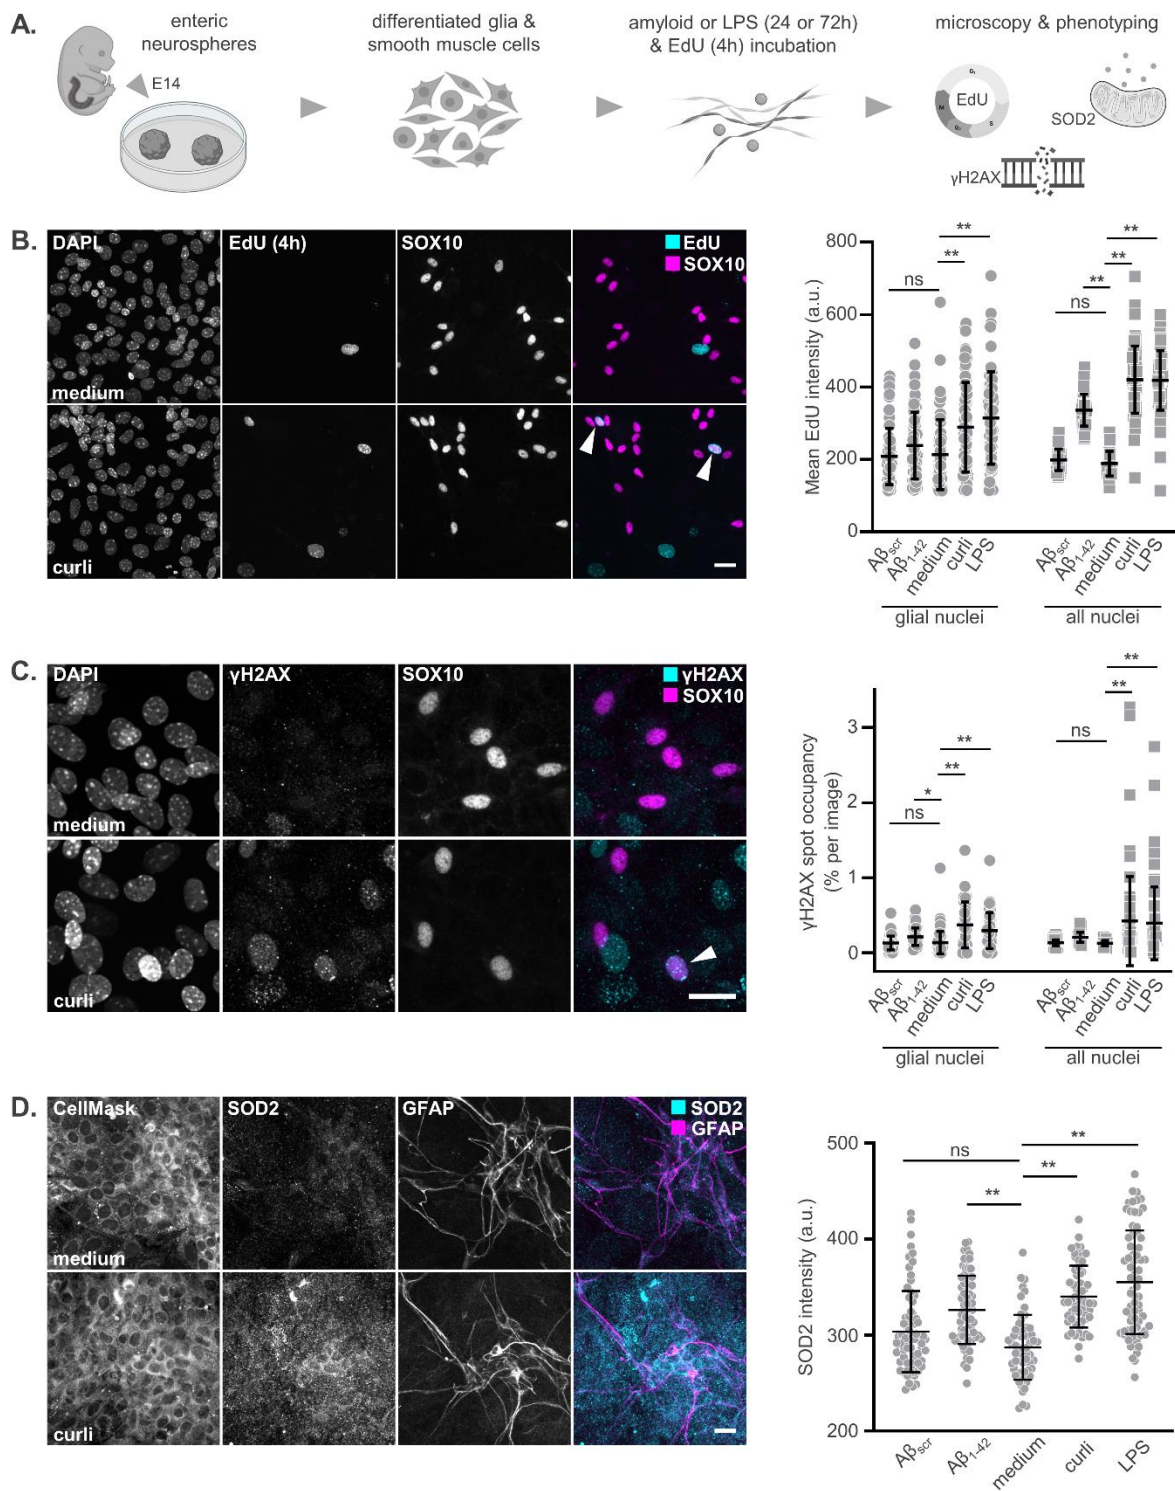

584

585



586 *Figure 2. Enteric glia and smooth muscle cells become activated after amyloid challenge*

587 **A.** Experimental workflow for challenging neurosphere-derived glial/smooth muscle cell cultures  
588 with amyloids and LPS and subsequent phenotyping (n=3 independent cultures with 24  
589 images/culture); **B.** Representative images and EdU intensity quantification in glial nuclei as well  
590 as all nuclei (after resp. SOX10 and DAPI segmentation; arrowheads indicate EdU<sup>+</sup>SOX10<sup>+</sup>  
591 nuclei). Enteric glia as well as smooth muscle cells show increased EdU incorporation after 24h  
592 A $\beta$ <sub>1-42</sub>, curli or LPS stimulation (mean  $\pm$  SD; ANOVA glial nuclei p<0.005 and all nuclei p<0.005;  
593 \*\*p<0.005 in Dunnett with medium); **C.** Representative confocal microscopy images and  
594 quantification of 72h medium- and curli-treated cultures, stained for  $\gamma$ H2AX as a marker of DNA  
595 damage.  $\gamma$ H2AX spot occupancy was quantified in glial nuclei (SOX10 segmentation; arrowhead  
596 indicates a  $\gamma$ H2AX<sup>+</sup>/SOX10<sup>+</sup> nucleus) and in all nuclei (based on DAPI segmentation), showing  
597 that glial as well as smooth muscle cells show amyloid- and LPS-induced double stranded DNA  
598 breaks (mean  $\pm$  SD; ANOVA glial nuclei p<0.005 and all nuclei p<0.005; \*p<0.05 and \*\*p<0.005  
599 in Dunnett with medium); **D.** Representative confocal microscopy images and quantification of  
600 24h medium- and curli-treated cultures, stained for CellMask, SOD2 and the glia marker GFAP.  
601 Quantification of SOD2 intensity in the CellMask positive area reveals an increase after A $\beta$ <sub>1-42</sub>,  
602 curli and LPS treatment compared to medium or A $\beta$ <sub>scr</sub> (mean  $\pm$  SD; ANOVA p<0.005; \*\*p<0.005  
603 in Dunnett with medium). All scale bars 20  $\mu$ m.

604

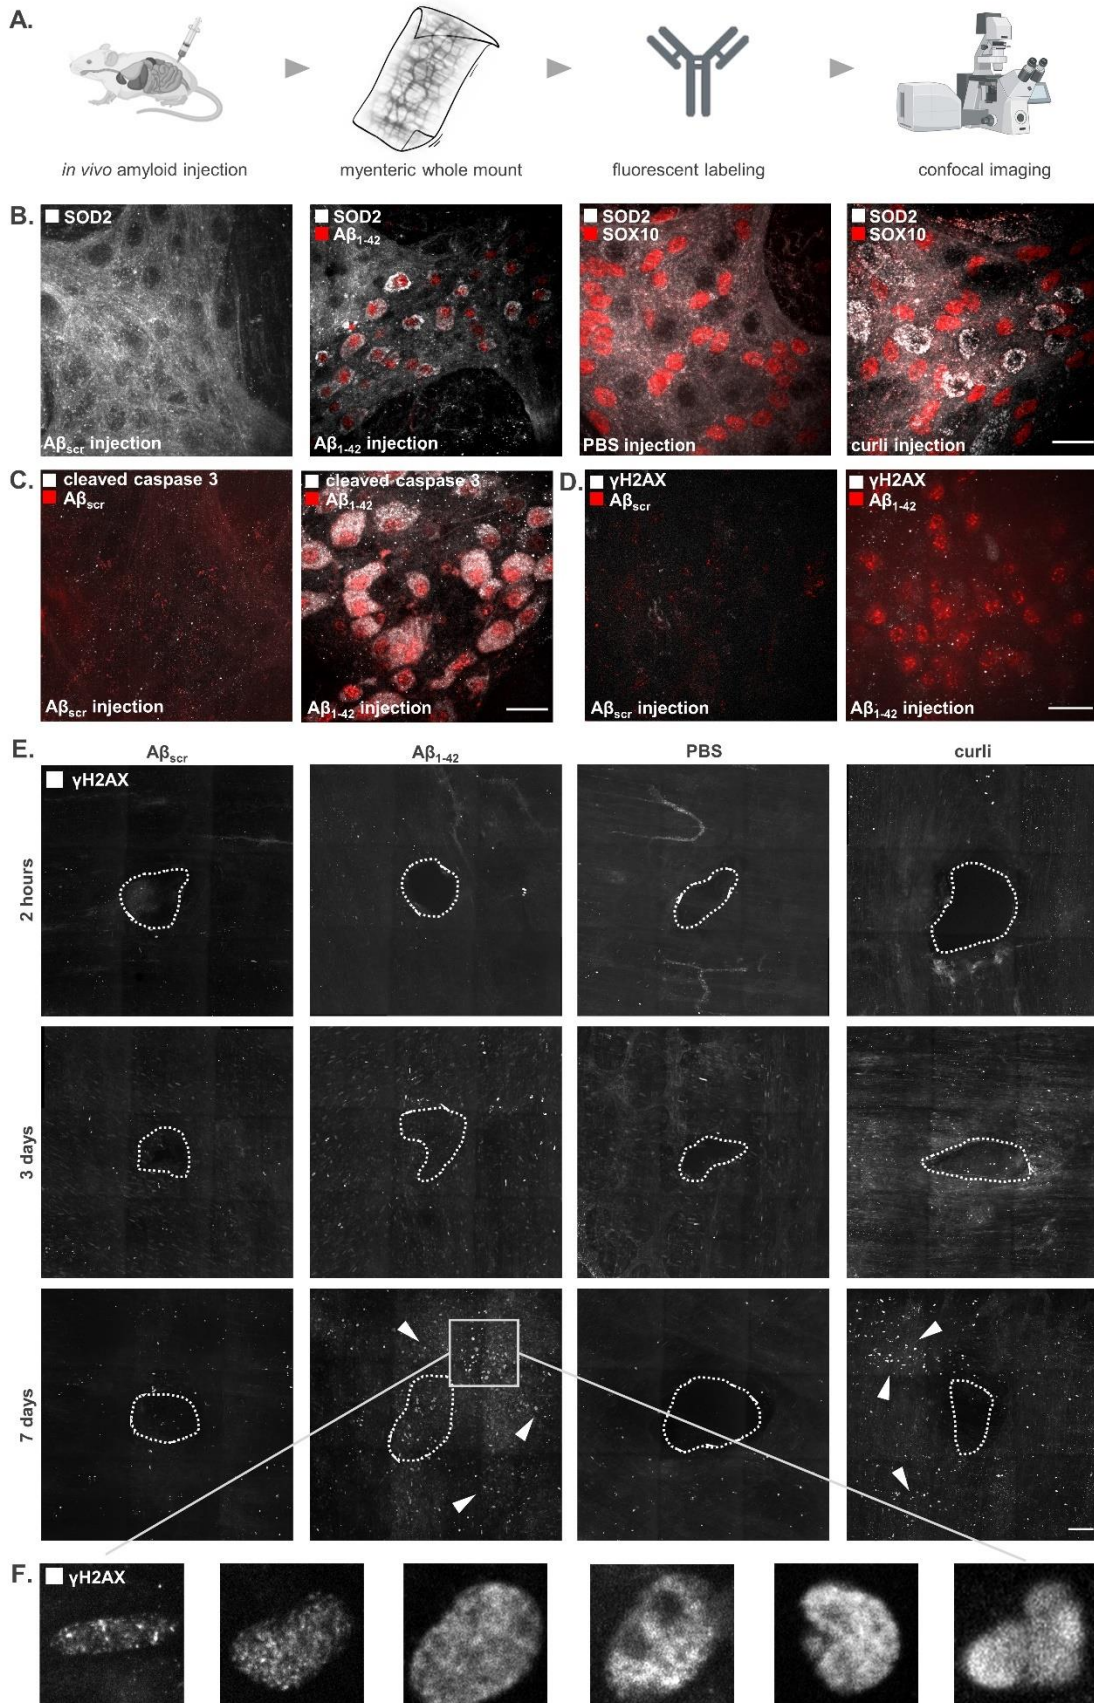

606 *Figure 3. In vivo injected amyloids induce oxidative stress and apoptosis in myenteric neurons*  
607 *and DNA damage in the muscularis*

608 **A.** Experimental workflow. Mice received an intramural injection  $A\beta_{scr}$ -FAM,  $A\beta_{1-42}$ -hilyte555,  
609 PBS or curli in the proximal colon and immunostainings were carried out on whole mount  
610 preparations from the region adjacent to the injection sites; **B.** Increased SOD2 levels 2h after the  
611 injection in  $A\beta_{1-42}$ -positive neurons, which were absent in  $A\beta_{scr}$ -injected mice. Similar  
612 upregulation was also observed after curli but not PBS injection; **C.** Cleaved caspase 3, a marker  
613 of apoptosis, was elevated in neurons that accumulate  $A\beta_{1-42}$  in their nuclei while it was absent in  
614  $A\beta_{scr}$ -injected tissue, 2h post injection; **D.** Overt double-stranded DNA damage ( $\gamma$ H2AX signal)  
615 was not detected in amyloid-bearing myenteric neurons at the 2h timepoint; **E.**  $\gamma$ H2AX staining  
616 revealed a time-dependent accumulation of DNA damage (arrowheads) near the injection site  
617 (dashed line) upon  $A\beta_{1-42}$  or curli exposure but not after  $A\beta_{scr}$  and PBS injection; **F.** Zoomed and  
618 cropped images of nuclei with punctate or pan-nuclear  $\gamma$ H2AX signal and altered morphology,  
619 reminiscent of different stages of cell death; scale bars **B-D** 20  $\mu$ m and **E** 100  $\mu$ m.

620

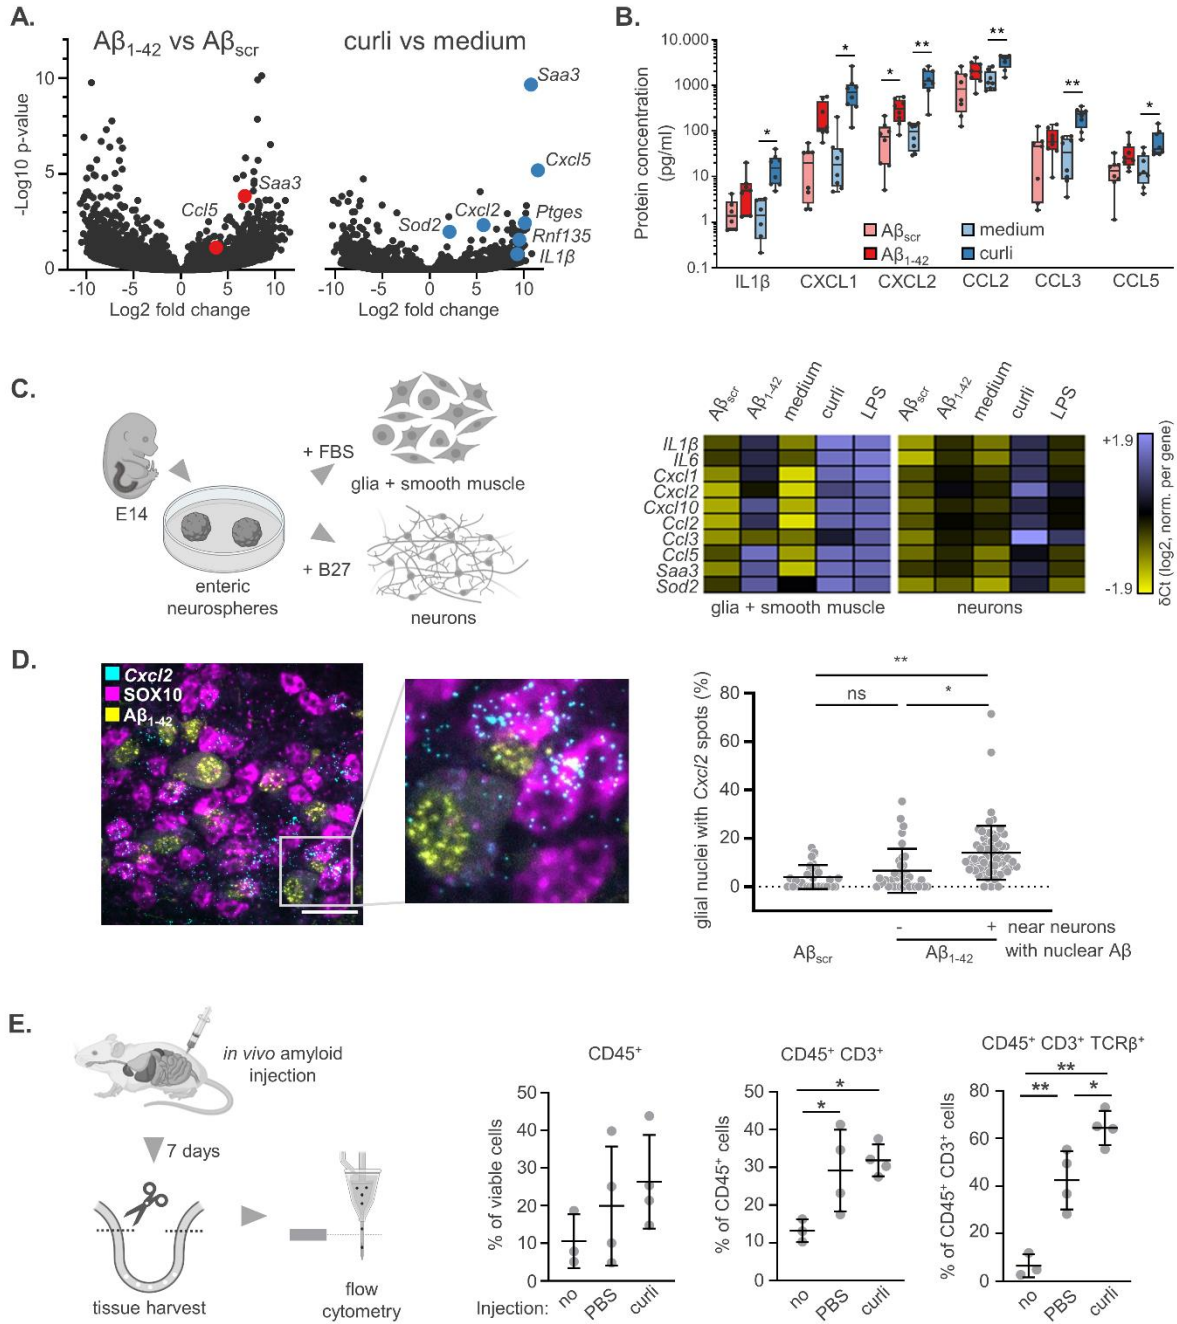

621

622



623 *Figure 4. Enteric glia initiate a pro-inflammatory response upon amyloid challenge*

624 **A.** Volcano plots of the RNA-Seq experiment described in **Fig. 1** show that many upregulated  
625 transcripts pertain to a pro-inflammatory response, whereby curli is more immunogenic than A $\beta$ <sub>1-42</sub>.  
626 **B.** Concentrations of pro-inflammatory cyto- and chemokines released into the culture medium,  
627 24h after challenging myenteric networks with A $\beta$ <sub>1-42</sub> (vs A $\beta$ <sub>scr</sub>) or curli (vs culture medium; n=8;  
628 glm with analyte/treatment/analyte\*treatment all p<0.0001; \*p<0.05 \*\*p<0.005 in Holm-Sidak-  
629 corrected t-test); **C.** Neurosphere-derived enteric neurons and mixed glia/smooth muscle cell  
630 cultures were challenged with amyloids or LPS for 24h. qPCR analysis revealed that  
631 mRNA encoding pro-inflammatory cytokines was induced mainly in the glial/smooth muscle cell  
632 cultures (n=3 independent cultures of each type); **D.** Fluorescence *in situ* hybridization for *Cxcl2*  
633 transcripts in myenteric whole mounts prepared from A $\beta$ <sub>1-42</sub>-injected colon (2h post injection). The  
634 percentage of SOX10-counterstained glial nuclei that contains *Cxcl2* spots is increased in  
635 myenteric ganglia with A $\beta$ <sub>1-42</sub>-bearing neurons. Ganglia with intact myenteric neurons (no nuclear  
636 A $\beta$ <sub>1-42</sub>) in the same whole mounts are indistinguishable from A $\beta$ <sub>scr</sub>-injected tissue (mean  $\pm$  SD;  
637 n=3 animals with  $\geq$ 10 images/animal and on average 35 SOX10<sup>+</sup> nuclei/image; One-way ANOVA  
638 p<0.0001; \*p<0.05 \*\*p<0.005 in Tukey's post-hoc). Scale bar 20  $\mu$ m; **E.** Sterile PBS or curli were  
639 injected in the proximal colon of live mice, and muscularis tissue of the colon was processed for  
640 flow cytometry 7 days later. A control group that received no injection/operation was included as  
641 well (mean  $\pm$  SD; n=4). The injected animals show a trend towards higher CD45<sup>+</sup> immune cell  
642 influx. A population of T-cells (CD45<sup>+</sup> CD3<sup>+</sup> TCR $\beta$ <sup>+</sup>) was specifically enriched after curli  
643 compared to PBS injection (ANOVA CD45<sup>+</sup> p=0.4025; CD45<sup>+</sup> CD3<sup>+</sup> p=0.0224; CD45<sup>+</sup> CD3<sup>+</sup>  
644 TCR $\beta$ <sup>+</sup> p=0.0001; \*p<0.05 \*\*p<0.005 in Tukey's post-hoc).

645

646 **Supplementary figures**

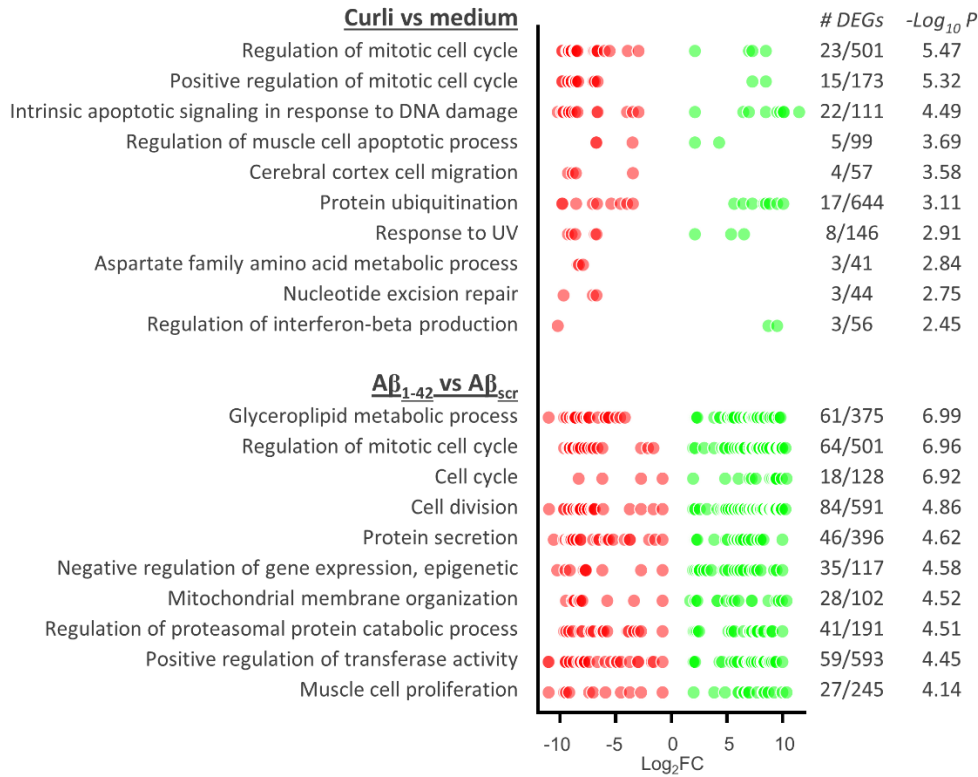

647

648 *Supplementary figure 1. Enriched Gene Ontology terms 24h after amyloid challenge*

649 Top 10 enriched terms for each amyloid type, with the Log<sub>2</sub> Fold Change of DEGs shown in red  
 650 (downregulated) and green (upregulated). The number of DEGs and p-value of term enrichment  
 651 are reported as well.

652

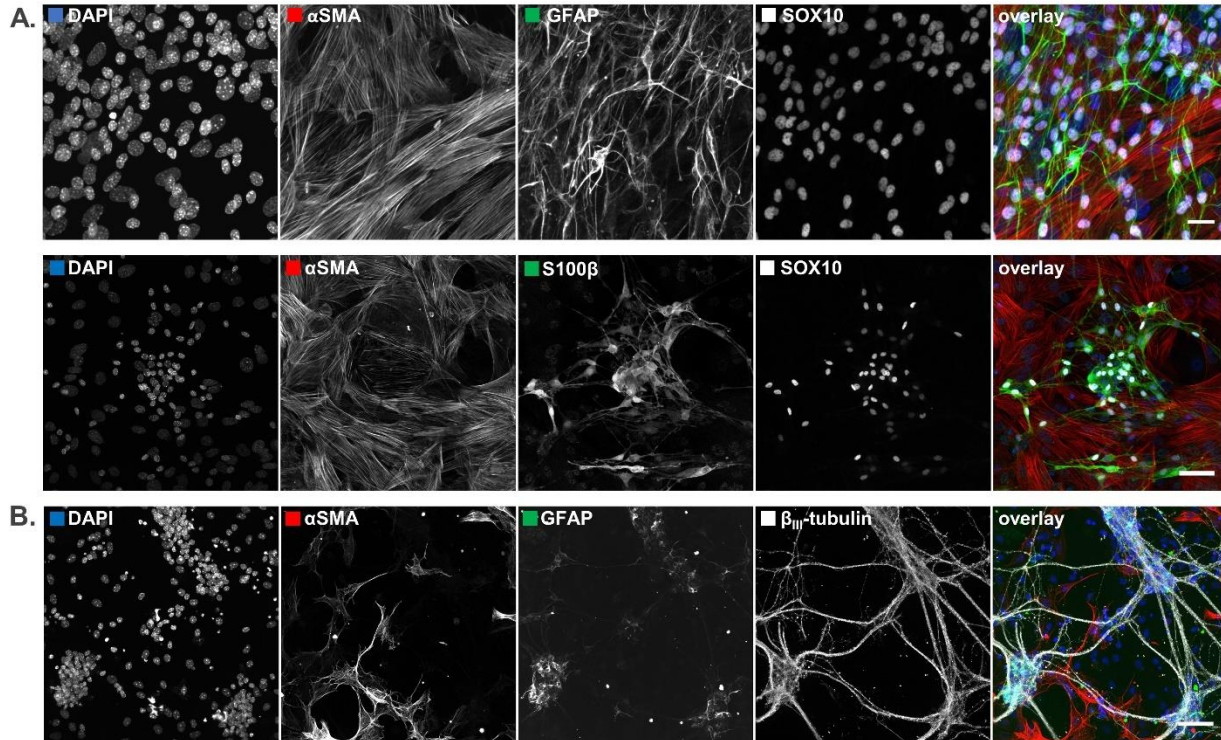

653

654 *Supplementary figure 2. Cell types present in enteric neurosphere-derived cultures*

655 Neurosphere-derived cultures were differentiated to enriched glia or neuronal cell cultures. **A.**

656 Confocal microscopy image show that neurosphere-derived glial cultures are mainly composed of

657 enteric glia (GFAP, S100 $\beta$  and SOX10) and smooth muscle cells ( $\alpha$ SMA); **B.** A differentiated

658 neuronal culture stained for the neuron marker  $\beta_{III}$ -tubulin, and for the glial and smooth muscle

659 markers GFAP and  $\alpha$ SMA, respectively. In addition to an extensive neuronal network, these

660 cultures contain a low number of glia and smooth muscle cells. All scale bars 50  $\mu$ m.

661

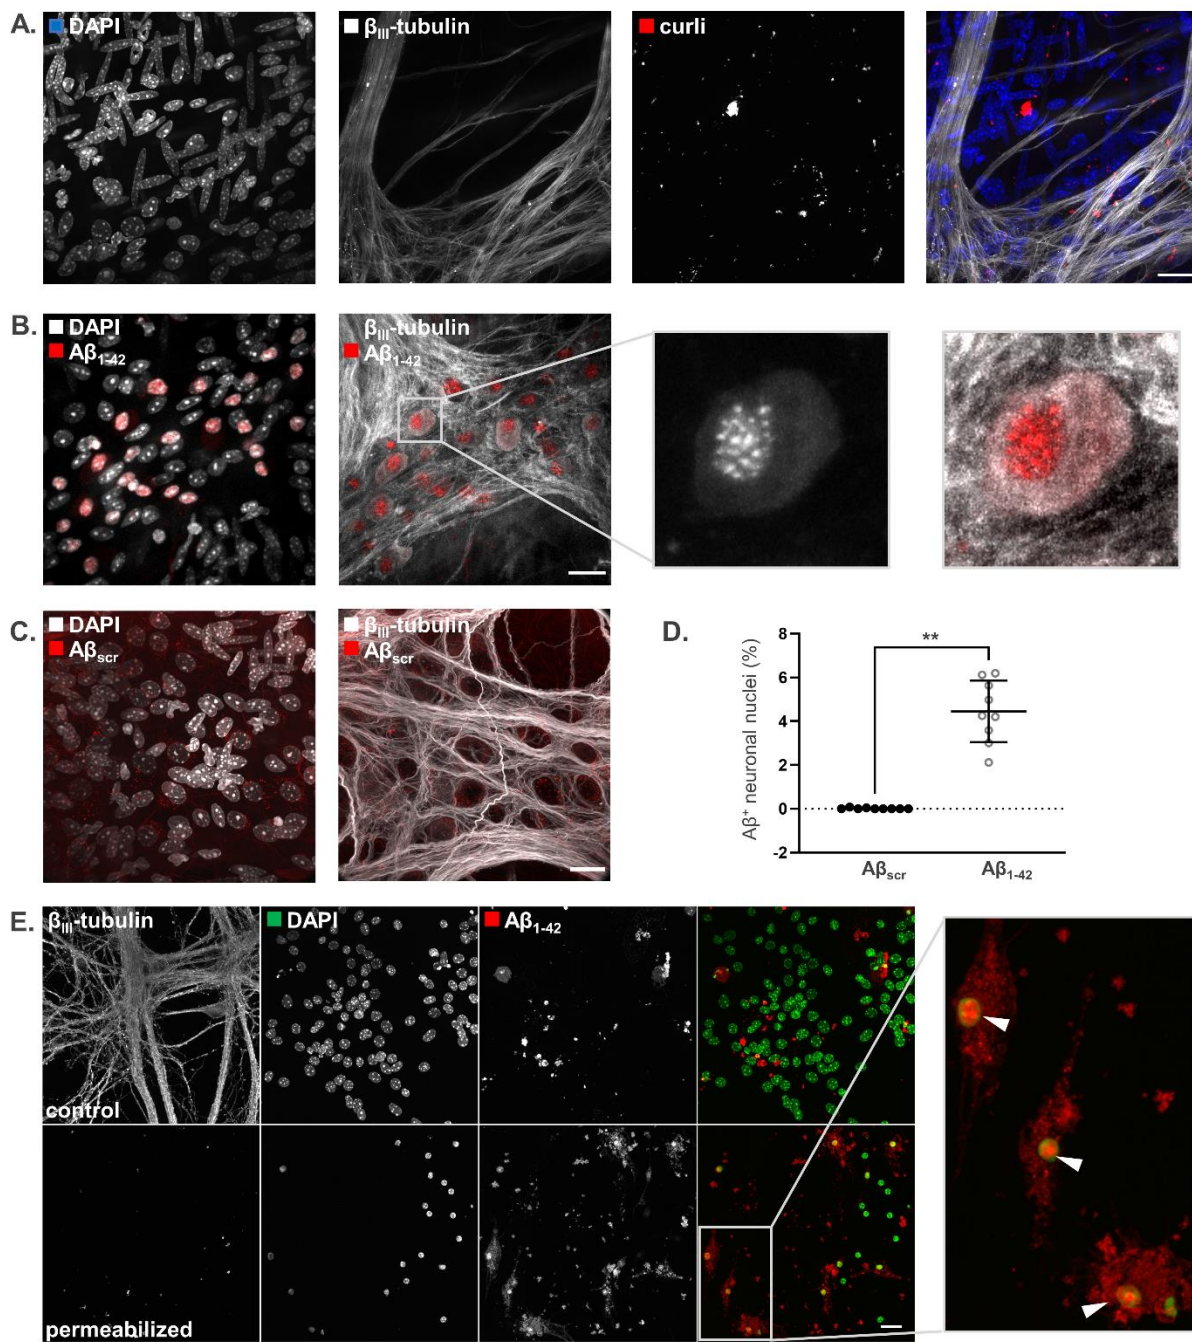

662

663



664 *Supplementary figure 3. Injected amyloids accumulate differently in the myenteric plexus*

665 Fluorescently labeled curli, A $\beta$ <sub>1-42</sub> or A $\beta$ <sub>scr</sub> were injected into the proximal colon wall of live WT  
666 mice, which were sacrificed 2h later. Then, whole mounts were prepared from the region close to  
667 the injection sites to study amyloid distribution and uptake near the myenteric plexus; **A.** Injected  
668 curli showed a stochastic distribution pattern without apparent cellular uptake; **B.** A $\beta$ <sub>1-42</sub>  
669 accumulated in nuclei of myenteric neurons, as shown by DAPI and  $\beta$ <sub>III</sub>-tubulin counterstaining;  
670 **C.** Injected A $\beta$ <sub>scr</sub> did not accumulate in neuronal nuclei; **D.** Quantification revealed that the  
671 percentage of neuronal nuclei with amyloid signal was significantly higher for A $\beta$ <sub>1-42</sub> than A $\beta$ <sub>scr</sub>  
672 (n=3 animals \* 3 whole mounts; p<0.005 in t-test); **E.** Neurosphere-derived enteric neurons were  
673 exposed to 1  $\mu$ M A $\beta$ <sub>1-42</sub>-hilyte555 in the presence or absence of 0.02% Triton X-100 for 24h.  
674 Amyloid accumulation in nuclei was observed in permeabilized cells but not in control cultures.  
675 All scale bars 20  $\mu$ m.

676

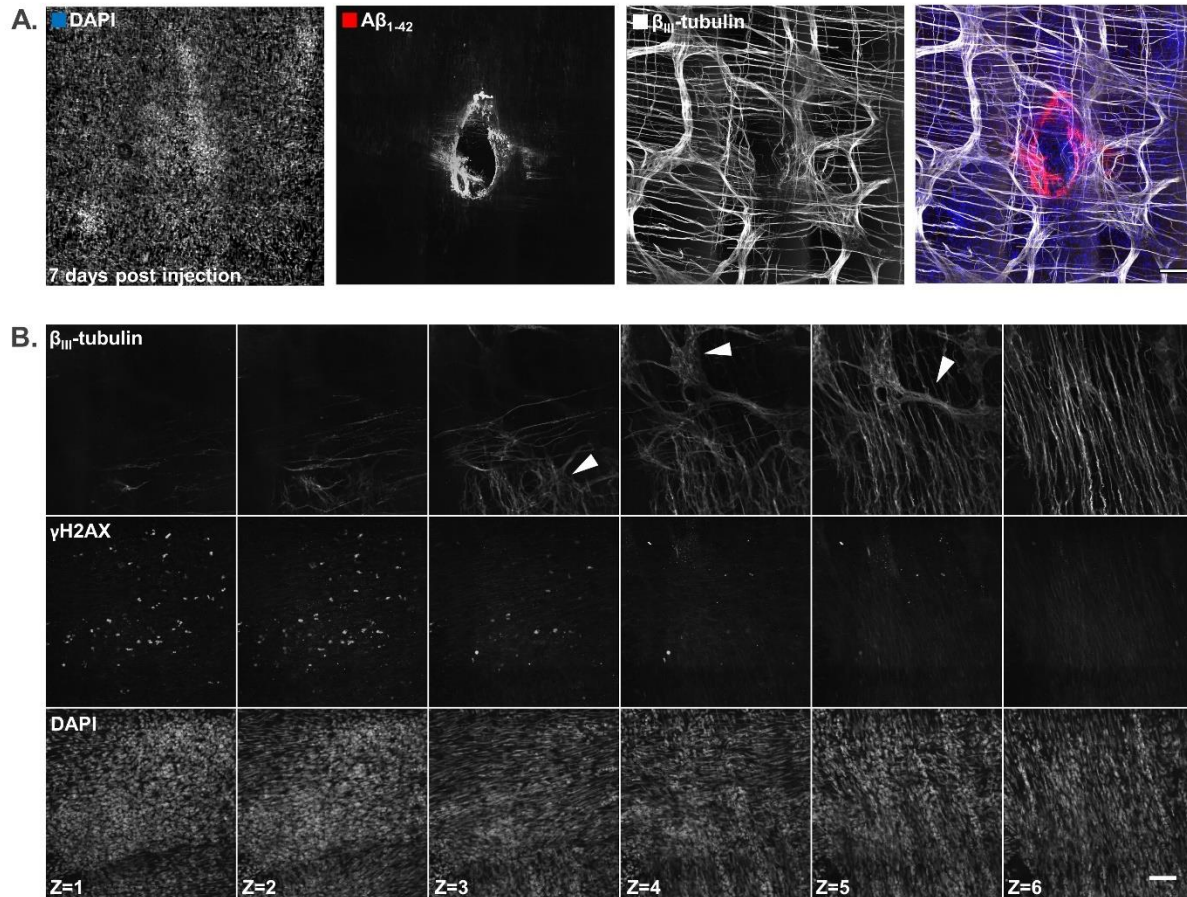

677

678 *Supplementary figure 4. Identification of an injection site and localization of  $\gamma$ H2AX<sup>+</sup> nuclei to the*  
679 *muscle layer*

680 **A.** Identification of an injection site based on an accumulation of amyloid, a local disruption of the  
681 neuronal network ( $\beta_{III}$ -tubulin), and a cell infiltrate near the damaged part (DAPI; 7 days post  
682 injection); **B.** Confocal images taken at different Z-positions indicate that the majority of  $\gamma$ H2AX<sup>+</sup>  
683 nuclei are localized in the muscle layer and not in ganglia of the myenteric plexus (myenteric  
684 plexus is indicated with arrowheads). All scale bars 100  $\mu$ m.

685
